# Supplementary material for: A high-performance n-butanol gas sensor based on ZnO nanoparticles synthesized by a low-temperature solvothermal route
Source: Royal Society of Chemistry journal article supplement (doi:10.1039/c5ra05148g), 2015-01-01
Supplement: c5ra05148g1.pdf [file c5ra05148g1.pdf]

Electronic Supplementary Material (ESI) for RSC Advances.  
This journal is © The Royal Society of Chemistry 2014

## A high-performance n-butanol gas sensor based on ZnO nanoparticles synthesized by a low-temperature solvothermal route

Xu Liu,<sup>a</sup> Nan Chen,<sup>a</sup> Xinxin Xing,<sup>a</sup> Yuxiu Li,<sup>a</sup> Xuechun Xiao,<sup>a,b</sup> Yude Wang,<sup>\*a,b</sup> and Igor Djerdj<sup>\*c</sup>

<sup>a</sup>*School of Physics Science and Technology, Yunnan University, 650091 Kunming, People's Republic of China.*

<sup>b</sup>*Yunnan Province Key Lab of Micro-Nano Materials and Technology, Yunnan University, 650091 Kunming, People's Republic of China. Fax: +8687165153832; Tel: +8687165031124; E-mail: ydwang@ynu.edu.cn.*

<sup>c</sup>*RuđerBošković Institute, Bijenička 54, 10000 Zagreb, Croatia. Fax: +38514680114; Tel: +38514680113; E-mail: igor.djerdj@irb.hr.*

**Table S1.** Structural and microstructural parameters extracted from the Rietveld refinement of powder XRD pattern.

| Space group                                                                        | <i>P</i> 6 <sub>3</sub> <i>mc</i> (186) |
|------------------------------------------------------------------------------------|-----------------------------------------|
| Lattice parameters                                                                 |                                         |
| <i>a</i> (Å)                                                                       | 3.2520 (2)                              |
| <i>b</i> (Å)                                                                       | 3.2520 (2)                              |
| <i>c</i> (Å)                                                                       | 5.2092 (3)                              |
| Unit Cell Volume (Å <sup>3</sup> )                                                 | 47.7104                                 |
| Zn                                                                                 |                                         |
| <i>x</i>                                                                           | 0.33330                                 |
| <i>y</i>                                                                           | 0.66670                                 |
| <i>z</i>                                                                           | 0.00000                                 |
| O                                                                                  |                                         |
| <i>x</i>                                                                           | 0.33330 (0)                             |
| <i>y</i>                                                                           | 0.66670 (0)                             |
| <i>z</i>                                                                           | 0.38592 (7)                             |
| Average apparent crystallite size (nm)                                             | 6.862                                   |
| Average maximum microstrain (10 <sup>-4</sup> )                                    | 4.2311                                  |
| Discrepancy factor (profile-weighted residual error) ( <i>R</i> <sub>wp</sub> (%)) | 10.3                                    |
| Bragg R-factor                                                                     | 2.93                                    |
| Goodness-of-fit indicator (GoF-Index)                                              | 2.40                                    |

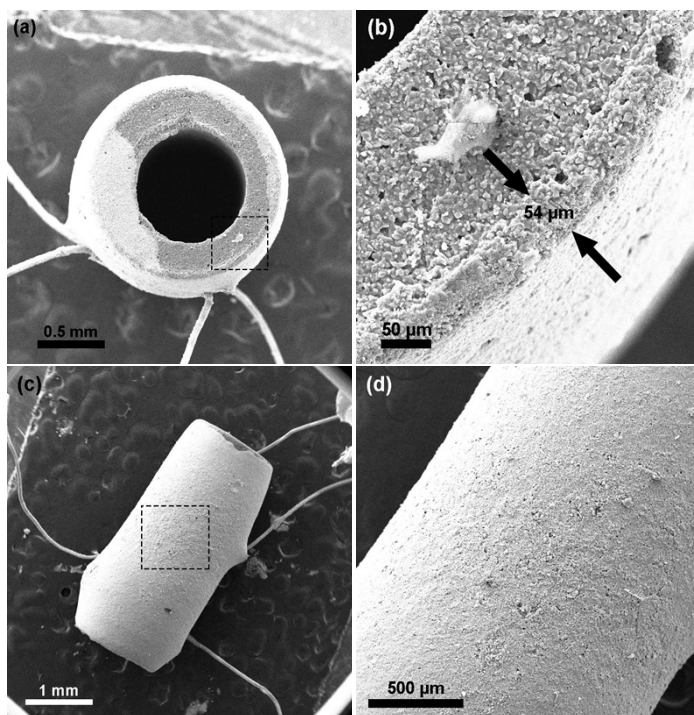

Fig. S1 Cross section SEM images (a) and (b) of the sensor, and surface SEM images (c) and (d) of the sensor.

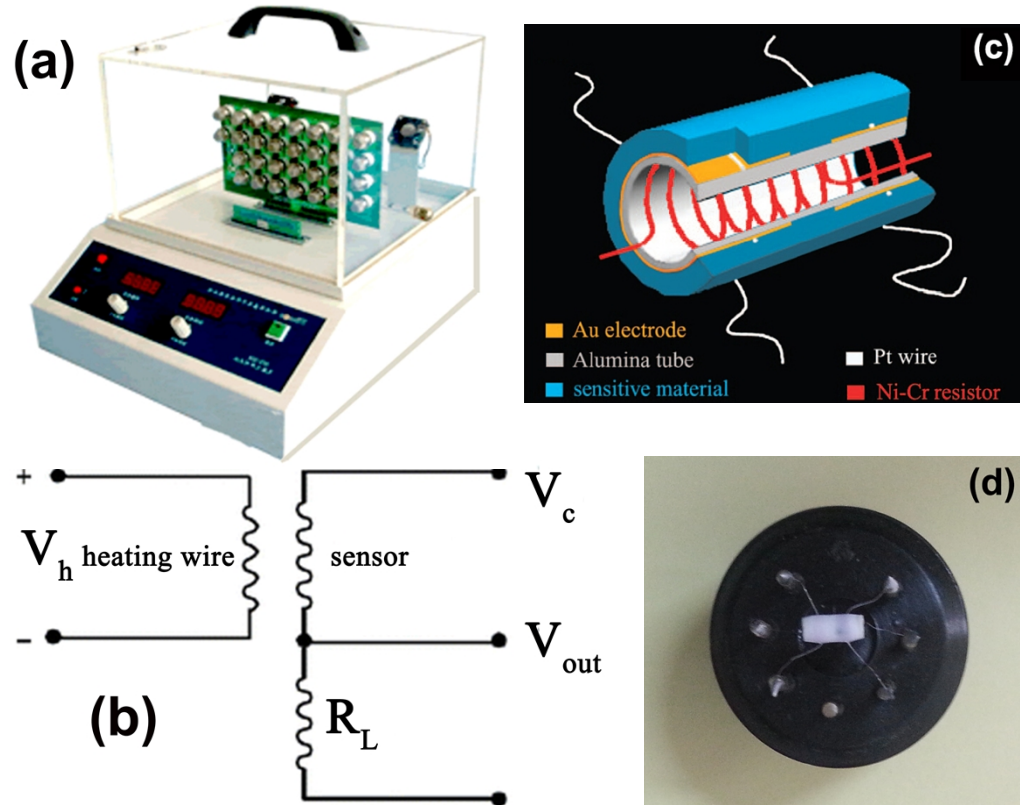

Fig. S2 (a) A photograph of the WS-30 A testing system, (b) the basic testing principle (where  $V_h$  is the heating voltage,  $R_L$  is a constant load resistance,  $V_{out}$  is the sensor export voltage, and  $V_c$  is the working voltage (5 V).), (c) the schematic structure of the gas sensor, and (d) the picture of a completed gas sensor.

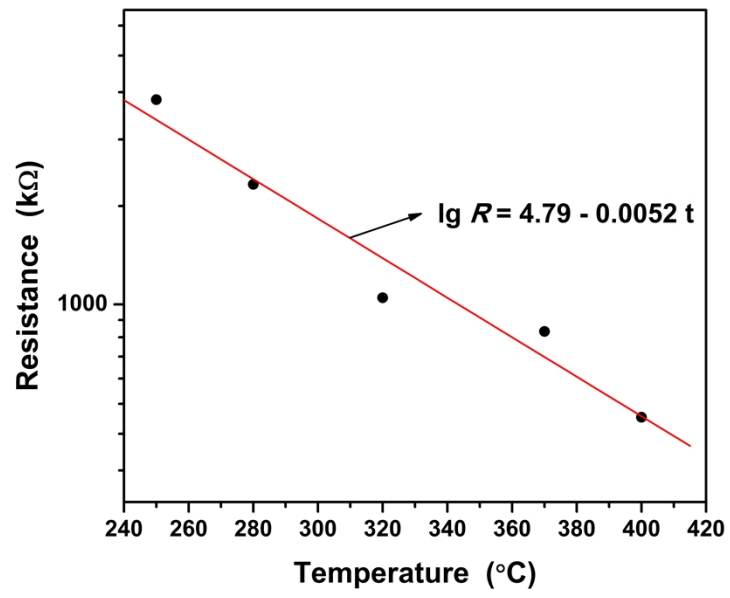

Fig. S3 Variation of resistance with temperature.

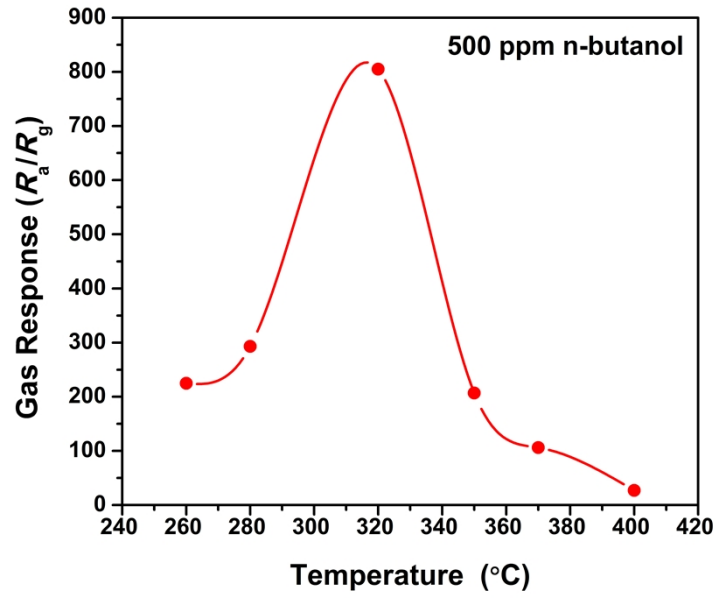

Fig. S4. Gas responses of as-fabricated gas sensor toward 500 ppm n-butanol gas tested at different temperature.

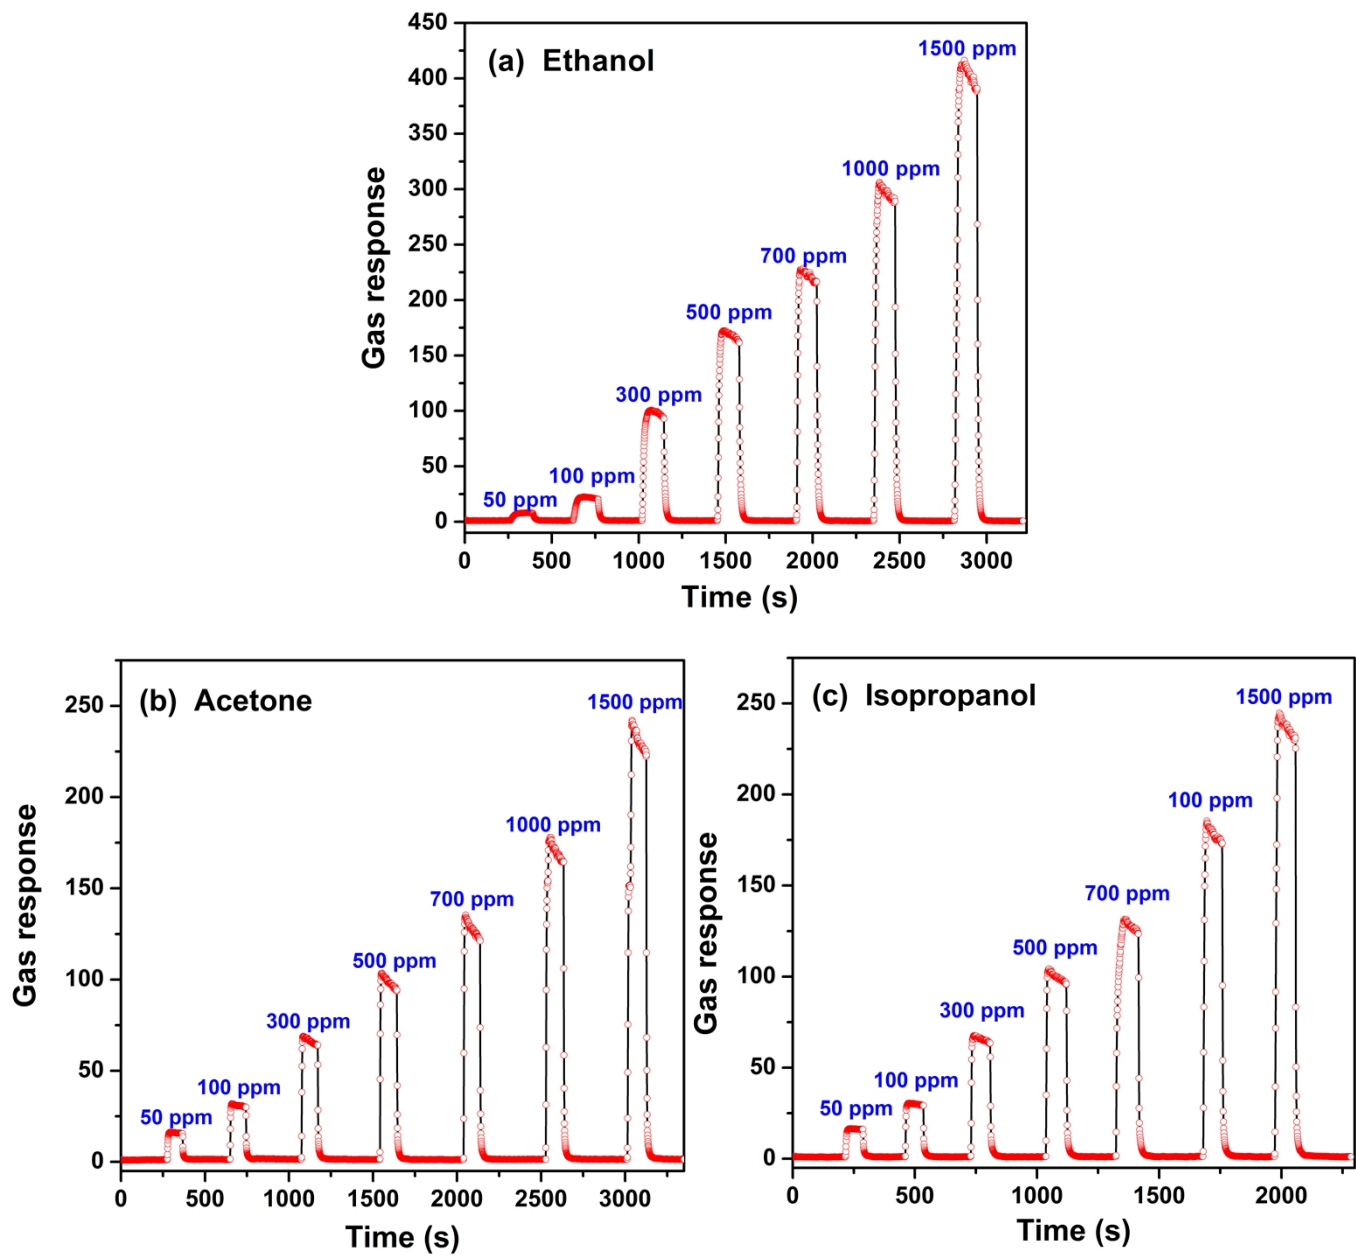

Fig. S5. Dynamic response curves of as-fabricated sensor toward ethanol, acetone and isopropanol at 320 °C.

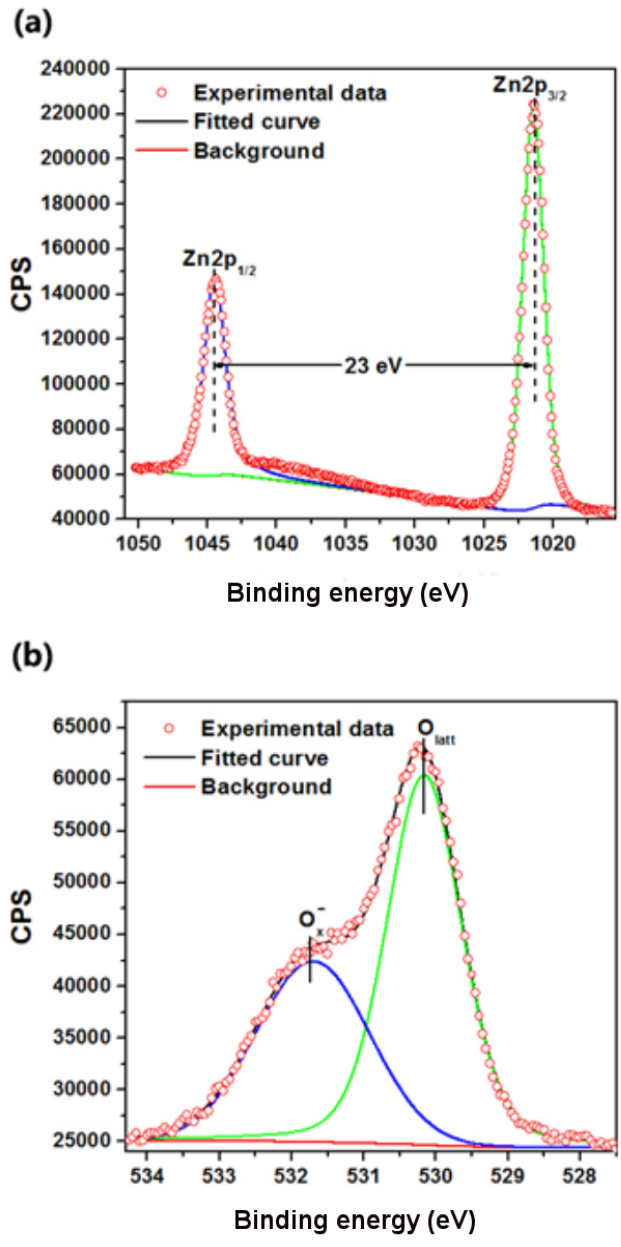

Fig. S6. The high-resolution XPS spectra of (a) Zn2p and (b) O1s of ZnO nanoparticles.
